# Supplementary material for: Inference of Population Structure using Dense Haplotype Data
Source: PubMed Central journal article supplement (PMC3266881; doi:10.1371/journal.pgen.1002453), 2012-01-26
Supplement: pgen.1002453.s041.pdf [file pgen.1002453.s041.pdf]

| Continent          | Populations                                                                                                                |
|--------------------|----------------------------------------------------------------------------------------------------------------------------|
| Africa             | San, BiakaPygmy, BantuSouthAfrica, BantuKenya, MbutiPygmy, Yoruba, Mandenka                                                |
| America            | Colombian, Pima, Surui, Maya, Karitiana                                                                                    |
| Central South Asia | Makrani, Uygur, Brahui, Burusho, Sindhi, Balochi, Hazara, Pathan, Kalash                                                   |
| East Asia          | Cambodian, Mongola, Oroqen, Xibo, Yi, Tu, Naxi, Daur, Hezhen, Han, Tuja, She, Japanese, Yakut, Dai, Lahu, Han.NChina, Miao |
| Europe             | Adygei, French, Tuscan, Italian, Sardinian, Russian, Orcadian, Basque                                                      |
| Middle East        | Mozabite, Bedouin, Palestinian, Druze                                                                                      |
| Oceania            | Melanesian, Papuan                                                                                                         |

Table 1: List of populations assigned to ‘continents’ for PCA.
