# Supplementary material for: Inference of Population Structure using Dense Haplotype Data
Source: PubMed Central journal article supplement (PMC3266881; doi:10.1371/journal.pgen.1002453), 2012-01-26
Supplement: pgen.1002453.s042.pdf [file pgen.1002453.s042.pdf]

## TEXT S1 Painting Algorithm

Li and Stephens (2003) described a likelihood based model that captures key features of the genealogical process with recombination while remaining computationally tractable for large datasets. Under the model, a chromosome is generated chunk-by-chunk by ‘copying’ from a conditional set of fixed haplotypes. In our notation, every individual consists of two haploids, each consisting of a single phased haplotype per chromosome. The  $L$  total SNPs in each haploid are listed one chromosome at a time, in order within each chromosome.

Suppose that we wish to generate a particular haploid  $h_* = \{h_{*1}, \dots, h_{*L}\}$ , with  $h_{*l}$  the observed allele of  $h_*$  at site  $l$ , using  $j$  pre-existing donor haploids  $h_1, \dots, h_j$ . Let  $\vec{\rho} = \{\rho_1, \dots, \rho_{L-1}\}$  be a vector of genetic distances, with  $\rho_l$  the population-scaled genetic distance between sites  $l$  and  $l+1$  (i.e.  $\rho_l = N_e g_l$ , where  $N_e$  is analogous to the “effective population size” and  $g_l$  is the genetic distance in Morgans between sites  $l$  and  $l+1$ ). (Between chromosomes, the genetic distance between the last site of the previous chromosome and the first site of the next chromosome is  $\infty$ .) Let  $\vec{f} = \{f_1, \dots, f_j\}$  be a vector of copying probabilities, with  $f_k$  the probability of copying from haploid  $h_k$  at any site. Let  $\theta$  correspond to a per site mutation (or “imperfect copying”) parameter. The conditional probability  $\Pr(h_* \mid h_1, \dots, h_j; \vec{\rho}, \vec{f}, \theta)$  is structured as a Hidden Markov model. Let  $\vec{Y} = \{Y_1, \dots, Y_L\}$  represent the hidden state sequence vector, with  $Y_l$  the existing haploid from the set  $h_1, \dots, h_j$  that haploid  $h_*$  copies from at site  $l$ . Switches in the haploid being copied between  $Y_l$  and  $Y_{l+1}$  occur as a Poisson process with rate  $\rho_l$ . The transition probabilities for  $Y$  between sites  $l$  and  $l+1$  are as follows (we exclude  $h_1, \dots, h_j$  and the parameters from the left side of equations (1) and (2) below for ease of reading):

$$\Pr(Y_{l+1} = y_{l+1} \mid Y_l = y_l) = \begin{cases} \exp(-\rho_l) + (1 - \exp(-\rho_l))f_{y_{l+1}} & \text{if } y_{l+1} = y_l; \\ (1 - \exp(-\rho_l))f_{y_{l+1}} & \text{otherwise,} \end{cases} \quad (1)$$

The observed state sequence component of the Hidden Markov Chain, the probability of observing a particular allele given the haploid that  $h_*$  is copying from at a given SNP, allows for “imperfect” copying:

$$\Pr(h_{*l} = a \mid Y_l = y) = \begin{cases} 1.0 - \theta & h_{yl} = a; \\ \theta & h_{yl} \neq a. \end{cases} \quad (2)$$

Here  $h_{kl}$  refers to the allelic type of haploid  $k$  at SNP  $l$ . To calculate  $\Pr(D) \equiv \Pr(h_* \mid h_1, \dots, h_j; \vec{\rho}, \vec{f}, \theta)$ , a summation is performed over all permutations of the copying process, i.e. a summation over all possible  $y$ , which can be accomplished efficiently using the forward algorithm (e.g. Rabiner 1989).

For all analyses presented here, we fix the mutation parameter  $\theta$  to Watterson's estimate (Watterson 1975), as used by Li and Stephens (2003), i.e.

$$\theta = \frac{1}{2} \frac{\left(\sum_{i=1}^j 1/i\right)^{-1}}{j + \left(\sum_{i=1}^j 1/i\right)^{-1}}$$

for  $j$  total haploids. We fix each  $g_l$  by taking the build 36 genetic distance estimates from the HapMap website (<http://www.hapmap.org>), which were calculated using Phase II genotypes and averaging values across the three HapMap populations as described by the International HapMap Consortium (2007). We also fix each  $f_k$  to be  $1/j$  for  $k = 1, \dots, j$ , allowing for equal *a priori* probability of copying from each conditional haploid.

### Calculating expected number of chunks copied:

The average number of chunks copied to a haploid  $*$  is a random variable denoted  $\hat{x}_i = \mathbb{E}_{l=1 \dots L}(X_{il})$ , where  $X_{il}$  is the probability that a given locus  $l$  is a new haplotypic segment copied from individual  $i$ . To calculate  $\hat{x}_1, \dots, \hat{x}_j$ , the posterior expected number of chunks for which haploid  $h_*$  copies from each of  $h_1, \dots, h_j$ , respectively, we calculate  $\hat{f}_{k,l}$ , the probability haploid  $h_*$  is copying from haploid  $h_k$  at site  $l$  given at least one ‘switch’ has occurred between  $l-1$  and  $l$ . Again excluding parameters for ease of reading, let  $\alpha_{kl} = \Pr(h_{*1}, \dots, h_{*l}, Y_l = h_k)$  and  $\beta_{kl} = \Pr(h_{*(l+1)}, \dots, h_{*L} \mid Y_l = h_k)$ . Then

$$\begin{aligned} \hat{x}_k &= \frac{\alpha_{k1}\beta_{k1}}{\Pr(D)} + \sum_{l=1}^{L-1} \left(\frac{1}{\Pr(D)}\right) \left[ \alpha_{k(l+1)}\beta_{k(l+1)} - \alpha_{kl}\beta_{k(l+1)} \Pr(h_{*(l+1)} \mid Y_{l+1} = h_k) \exp(-\rho_l) \right] \\ &= \frac{\alpha_{k1}\beta_{k1}}{\Pr(D)} + \sum_{l=1}^{L-1} \hat{f}_{k,l}. \end{aligned} \tag{3}$$

Note that we later drop the ‘hat’ notation for convenience, and form the matrix of all haplotype recipients  $*$  as  $x_{ij}$ . Each row of  $x_{ij}$  corresponds to the vector  $\hat{x}$  calculated above.

We calculate  $\alpha_{kl}$  for  $k = 1, \dots, j$  in the following manner (Rabiner 1989):

1.  $\alpha_{k1} = \Pr(h_{*1} \mid Y_1 = h_k) f_k$
2.  $\alpha_{kl} = \Pr(h_{*l} \mid Y_l = h_k) \left( \left[ \sum_{i=1}^j \alpha_{i(l-1)} \right] f_k (1 - \exp(-\rho_l)) + \exp(-\rho_l) \alpha_{k(l-1)} \right)$   
for  $l = 2, \dots, L$ .

We calculate  $\beta_{kl}$  for  $k = 1, \dots, j$  in the following manner (Rabiner 1989):

1.  $\beta_{kL} = 1.0$
2.  $\beta_{kl} = \left[ \sum_{i=1}^j \beta_{i(l+1)} f_i \Pr(h_{*(l+1)} \mid Y_{l+1} = h_i) \right] (1 - \exp(-\rho_l)) + \exp(-\rho_l) \Pr(h_{*(l+1)} \mid Y_{l+1} = h_k) \beta_{k(l+1)}$  for  $l = 1, \dots, (L-1)$ .

### Calculating expected lengths of copied chunks:

To calculate  $\hat{l}_1, \dots, \hat{l}_j$ , the posterior expected length (in Morgans) of the total genome for which haploid  $h_*$  copies from each of  $h_1, \dots, h_j$ , respectively, we calculate the following (let  $\text{Pr}_h \equiv \text{Pr}(h_{*(l+1)} \mid Y_{l+1} = h_k)$ ):

$$\begin{aligned} \hat{l}_k = & \frac{1}{\text{Pr}(D)} \sum_{l=1}^{L-1} g_l \left[ \alpha_{kl} \beta_{k(l+1)} \left( \exp(-\rho_l) + (1.0 - \exp(-\rho_l)) f_k \right) \text{Pr}_h \right. \\ & \left. + (1/2) \left[ \alpha_{kl} \beta_{kl} + \alpha_{k(l+1)} \beta_{k(l+1)} - 2\alpha_{kl} \beta_{k(l+1)} \left( \exp(-\rho_l) + (1.0 - \exp(-\rho_l)) f_k \right) \text{Pr}_h \right] \right]. \end{aligned} \quad (4)$$

Note that this involves the approximation that at most only one change point occurs between neighbouring sampled sites. To get the expected length of *each* chunk copied from donor  $h_k$ , we divide equation (4) by equation (3) (i.e.  $\hat{l}_k / \hat{x}_k$ ).

### Calculating expected number of mutations:

To calculate  $\hat{m}_1, \dots, \hat{m}_j$ , the posterior expected number of SNPs for which haploid  $h_*$  copies with mutation (i.e. emission) from each of  $h_1, \dots, h_j$ , respectively, we calculate the following (let  $\mathbb{I}_{[h_{*l} \neq h_{kl}]}$  be an indicator that the allelic type carried by  $h_*$  does not match the allelic type carried by  $h_k$  at SNP  $l$ ):

$$\hat{m}_k = \frac{1}{\text{Pr}(D)} \sum_{l=1}^{L-1} \alpha_{kl} \beta_{kl} \mathbb{I}_{[h_{*l} \neq h_{kl}]}. \quad (5)$$

### Using the E-M algorithm to estimate the scaling parameter $N_e$ :

One can take a fixed  $N_e$  for calculating  $\vec{\rho}$ , or use the Expectation-Maximisation (E-M) algorithm to find a local maximum of  $N_e$  in the following manner. Start with an initial value of  $N_e$  (we take  $N_e = 400,000/j$ ), and at each iteration of the E-M replace  $N_e$  with:

$$N_e^* = \frac{\sum_{l=1}^{L-1} \left( \left[ \sum_{k=1}^j \hat{f}_{k,l} \right] [\rho_l] / [1.0 - \exp(-\rho_l)] \right)}{\sum_{l=1}^{L-1} g_l}, \quad (6)$$

where  $\rho_l$  and each  $\hat{f}_{k,l}$  are calculated using the previous value of  $N_e$ . In analyses presented here, we used 10 iterations of E-M to get our final estimate of  $N_e$ .

### Using the E-M algorithm to estimate the mutation parameter $\theta$

One can take a fixed  $\theta$  for calculating (2), or use the E-M to find a local maximum of  $\theta$  in the following manner. Start with an initial value of  $\theta$  (we start with Watterson's estimate of  $\theta$ ), and at each iteration of the E-M replace  $\theta$  with:

$$\theta^* = \frac{\sum_{l=1}^L (\sum_{i=1}^j \alpha_{il} \beta_{il} I_{[h_{*l} \neq h_{il}]}) / \Pr(D)}{L}. \quad (7)$$

Here  $I_{[h_{*l} \neq h_{il}]}$  is an indicator that the allele  $h_{*l}$  carried by the recipient is not equal to allele  $h_{il}$  carried by donor haploid  $i$  at SNP  $l$ , and each  $\alpha_{il}$ ,  $\beta_{il}$  and  $\Pr(D)$  are calculated using the previous value of  $\theta$ .

## References

- INTERNATIONAL HAPMAP CONSORTIUM, 2007 A second generation human haplotype map of over 3.1 million SNPs. *Nature* **449**: 851–61.
- LI, N. and M. STEPHENS, 2003 Modeling Linkage Disequilibrium and Identifying Recombination Hotspots Using Single-Nucleotide Polymorphism Data. *Genetics* **165**: 2213–2233.
- RABINER, L., 1989 A tutorial on hidden markov models and selected applications in speech recognition. *Proceedings of the IEEE* **77**: 257–286.
- WATTERSON, G., 1975 On the number of segregating sites in genetical models without recombination. *Theor. Popul. Biol.* **7**: 256–276.
