# Supplementary material for: Inference of Population Structure using Dense Haplotype Data
Source: PLoS Genet. 2012 Jan 26;8(1):e1002453. doi: 10.1371/journal.pgen.1002453 (PMC3266881; doi:10.1371/journal.pgen.1002453)
Supplement: Text S2 — Derivation of the fineSTRUCTURE Partition Posterior probability. (PDF) [file pgen.1002453.s043.pdf]

## TEXT S2 Partition posterior probability evaluation

Here we define the full model for the coancestry matrix of expected copying counts  $x$  (dropping the ‘hat’ notation). Each row of  $x$  is distributed according to Multinomial likelihood  $F(\cdot)$  as defined in Equation 1 of the main text:

$$x|\eta, P = \prod_{i=1}^N x_i|P_{q_i} \sim \prod_{i=1}^N F(\cdot|P_{q_i}), \quad (1)$$

where  $N$  is the number of individuals,  $P_{q_i}$  is the row of  $P$  corresponding to the population  $q_i$  containing individual  $i$ ,  $K$  is the number of populations and  $\eta$  is the assignment of individuals to populations. Population membership  $q_i$  can be thought of as induced by  $\eta$ , as is the set of individuals found in a population  $S_a$ . A Dirichlet Process Prior (e.g. Teh 2010) is placed on  $\eta$ , which (approximately, for the purposes of exposition) means that for large  $K^* \rightarrow \infty$  (and not generally equal to  $K$ ), the probability of the number of individuals assigned to each population  $\mathbf{n}$  (which is related, but not equal to  $\{S_a\}_{a=1\dots K}$ ) follows  $\mathbf{n} \sim \text{Multinomial}(G)$  with  $G \sim \text{Dirichlet}(\alpha/K^*, \dots, \alpha/K^*)$ . Note that in this view, many of these populations will be empty, leaving a finite number  $K$  of occupied populations.

There are many representations of a Dirichlet Process, with a common choice being  $\{P_1, \dots, P_N\} \sim \text{DP}(\alpha, G_0)$ , where  $G_0$  is the ‘base distribution’, i.e. we sample parameters  $P_a$  from  $G_0$ , but obtain clustering by assigning the same parameters to multiple individuals. However, we choose an alternative description that suppressed  $G_0$  which is simpler in our case.

The representation we find most natural is the joint assignment distribution induced on  $\{\eta, K\}$ , where  $K$  is the number of populations observed in our sample. This takes the form (Huelsenbeck and Andolfatto 2007):

$$p(\eta, K|\alpha, N) = \alpha^K \frac{\prod_{a=1}^K \Gamma(|S_a|)}{\prod_{i=1}^N (\alpha + i - 1)}, \quad (2)$$

where there are  $N$  individuals, and  $\alpha$  is the ‘concentration parameter’ determining the number of occupied populations expected under the Dirichlet Process. In this case we can write the distribution of each probability vector  $P_a$ :

$$\{P_a, \dots, P_K\}|\eta = P|\eta \sim \prod_{a=1}^K \text{Dirichlet}(\beta_a), \quad (3)$$

which is conjugate to  $F$  (and note that  $\beta_a$  is a vector of length  $K$ ). This representation avoids the need to explicitly manage a  $G_0$  that is itself a function of the number of populations  $K$  as is the case in our model. Note that we are free to use any distribution here in principle; this choice of Dirichlet distribution is not related to our use of a Dirichlet Process Prior.

From Equation 2, for fixed  $N$  and  $\alpha$  the prior on  $\eta$  can be written:

$$\eta \sim p(\eta) \propto \alpha^K \prod_{b=1}^K \Gamma(|S_b|), \quad (4)$$

so that when  $\alpha = 1$  all possible assignments are given equal prior weight. This allows us to control  $K$  in principle (though in practice the likelihood term overwhelms the prior on  $K$ ), and applies the usual Bayesian penalty for having additional parameters (via additional populations), leading to low  $K$  solutions being favoured in the posterior. We wish to calculate the probability of a particular partition  $\eta$ :

$$P(\eta|x) \propto P(\eta) \prod_{a=1}^K L(x_{S_a}|\eta) \quad (5)$$

where  $L(x_{S_a})$  is the likelihood of all the individuals in population  $a$ :

$$L(x_{S_a}) = \prod_{m \in S_a} P_{< m, S_a}(x_m) = \int \prod_{m \in S_a} F(x_m|P_m) dH_{< m, S_a}(P_m), \quad (6)$$

where  $P_{< m, S_a}(x_m)$  is the probability of the data row  $x_m$  given the data for subset  $(1, \dots, m-1)$  of individuals in  $S_a$ , with an incremental probability distribution over  $P_a$  called (abusively)  $P_m$ . This is split up as the integral over the likelihood  $F(x_m|P_m)$  of the probability of the parameters given the previous individuals data,  $dH_{< m, S_a}(P_m)$ . Conjugacy allows the incremental probability to be written as:

$$dH_{< m, S_a}(P_m) = \text{Dirichlet} \left( P_m; \left\{ \beta_{ab} + d_{< m, b}^{S_a} \right\}_{b=1, \dots, K} \right), \quad (7)$$

where  $\beta_{ab}$  is the prior given by Equation 2 of the main text and  $d_{< m, b}^{S_a}$  are the counts from population  $S_b$  to population  $S_a$  for the individuals  $[[1, \dots, m-1]]$ . The final posterior follows from Eq. 3.13 of Lange (2002):

$$P(\eta|x) \propto \alpha^K \prod_{a=1}^K \Gamma(|S_a|) \frac{\Gamma(\beta_a)}{\Gamma(d_a + \beta_a)} \prod_{b=1}^K \frac{\Gamma(\beta_{ab} + x_{ab})}{\Gamma(\beta_{ab}) \hat{n}^{x_{ab}}}. \quad (8)$$

## References

- HUELSENBECK, J. P. and P. ANDOLFATTO, 2007 Inference of Population Structure Under a Dirichlet Process Model. *Genetics* **175**: 1787–1802.
- LANGE, K., 2002 *Mathematical and statistical methods for genetic analysis*. Springer.
- TEH, Y. W., 2010 Dirichlet Process. In C. Sammut and G. Webb (Eds.), *Encyclopedia of Machine Learning*, pp. 280–287. Springer.
